# Supplementary material for: Transcription Factor Driven Gene Regulation in COVID-19 Patients
Source: MDPI journal article supplement (doi:10.3390/v15051188), 2023-05-18
Supplement: s1 [file s1]

# Supplementary for “Transcription Factor Driven Gene Regulation in COVID-19 Patients”

**Daniele Santoni** <sup>1,\*†</sup>, **Nimisha Ghosh** <sup>2,3,†</sup>, **Carlo Derelitto** <sup>1,4</sup>, and **Indrajit Saha** <sup>5</sup>

<sup>1</sup> Institute for System Analysis and Computer Science “Antonio Ruberti”, National Research Council of Italy, 00185 Rome, Italy

<sup>2</sup> Faculty of Mathematics, Informatics and Mechanics, University of Warsaw, 02-097 Warsaw, Poland

<sup>3</sup> Department of Computer Science and Information Technology, Institute of Technical Education and Research, Siksha ‘O’ Anusandhan (Deemed to be University), Bhubaneswar 751030, India

<sup>4</sup> Department of Biological, Geological and Environmental Sciences, Alma Mater Studiorum—University of Bologna, 40138 Bologna, Italy

<sup>5</sup> Department of Computer Science and Engineering, National Institute of Technical Teachers’ Training and Research, Kolkata 700106, India

\* Correspondence: [daniele.santoni@iasi.cnr.it](mailto:daniele.santoni@iasi.cnr.it)

† These authors contributed equally to this work.

---

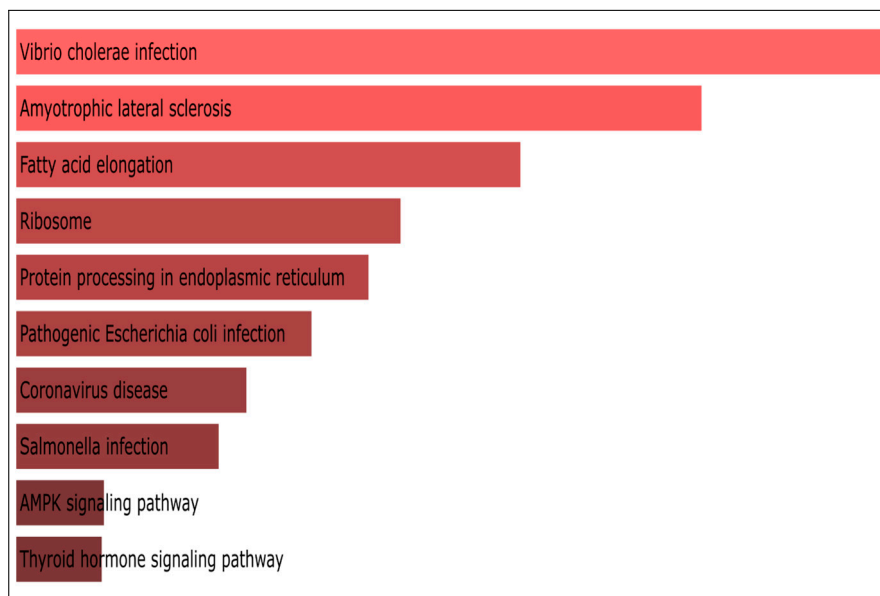

(a)

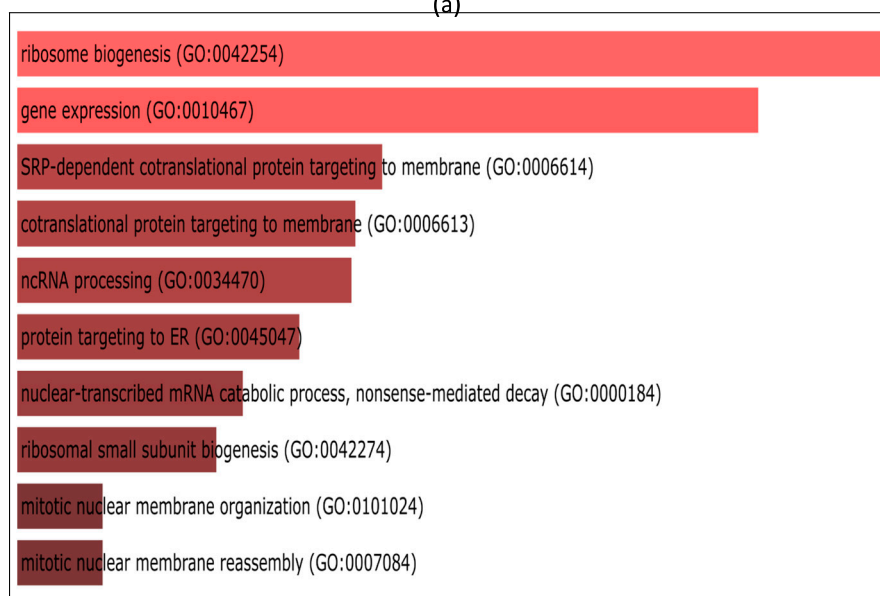

(b)

Figure S1: Significant KEGG pathways and (b) Significant GO Enrichment Analysis for the 31 identified genes
